# Supplementary material for: Synthesis and structure of QD-6: A novel aluminoborate constructed from unprecedented [B@Al6O24] and polyborate clusters
Source: Royal Society of Chemistry journal article supplement (doi:10.1039/c1dt11929j), 2011-12-01
Supplement: c1dt11929j.pdf [file c1dt11929j.pdf]

## Support information

### Synthesis and Structure of QD-6: A Novel Aluminoborate Constructed From Unprecedented [B@Al<sub>6</sub>O<sub>24</sub>] and Polyborate Clusters

Guo-Ming Wang,<sup>\*,a</sup> Jin-Hua Li,<sup>a</sup> Pei Wang,<sup>a</sup> Zeng-Xin Li,<sup>a</sup> Ying-Xia Wang,<sup>\*,b</sup> Zhe-Ming Wang<sup>b</sup> and Jian-Hua Lin<sup>b</sup>

<sup>a</sup>Teachers College, College of Chemistry, Chemical Engineering and Environment of Qingdao University, Shandong 266071, China; <sup>b</sup>Beijing National Laboratory for Molecular Sciences, College of Chemistry and Molecular Engineering, Peking University, Beijing 100871, China.

Email: gmwang\_pub@163.com; Fax: (+86) 532-8595-6024; wangyx@pku.edu.cn

### Experimental Section

**Synthesis:** QD-6 was prepared under hydrothermal conditions from a mixture of Al(*i*-PrO)<sub>3</sub> or AlCl<sub>3</sub>·6H<sub>2</sub>O, NH<sub>4</sub>B<sub>5</sub>O<sub>8</sub>·4H<sub>2</sub>O, cyclopentylamine (CPA), pyridine and H<sub>2</sub>O in a molar ratio of 1: 2.5: 5.5: 48: 61. Typically, 0.204 g of Al(*i*-PrO)<sub>3</sub> or 0.241 g of AlCl<sub>3</sub>·6H<sub>2</sub>O and 0.680 g of NH<sub>4</sub>B<sub>5</sub>O<sub>8</sub>·4H<sub>2</sub>O were dissolved in a mixed solution of 1.00 mL of H<sub>2</sub>O and 5.00 mL of pyridine, and then 0.35 mL of CPA was slowly added under constant stirring. The resulting mixture was stirred at ambient temperature for 6h, then sealed in a 25-mL Teflon-lined autoclave and heated at 170°C for 13 days. The autoclave was cooled to room temperature, and colorless prismatic single crystals were separated from the solution by filtration, washed with distilled water and dried in air (46% yield based on Al). Strictly controlling the molar quantity of the organic amine (ca. 5.0-5.5 mmol) is crucial for the formation of QD-6; otherwise, a known polyborate (NH<sub>4</sub>)<sub>2</sub>[B<sub>10</sub>O<sub>14</sub>(OH)<sub>4</sub>]·H<sub>2</sub>O<sup>1</sup> would be obtained when more or less amounts of CPA were used. Additionally, attempts to synthesize QD-6 from other aluminum sources such as Al<sub>2</sub>O<sub>3</sub>, Al<sub>2</sub>(SO<sub>4</sub>)<sub>3</sub> and Al(NO<sub>3</sub>)<sub>3</sub>, or by using boric acid as a boron source, were unsuccessful.

The experimental and simulated powder X-ray diffraction patterns are in good accordance with each other, indicating the phase purity of the sample (Fig. S4). IR (KBr pellet, cm<sup>-1</sup>): 3454 cm<sup>-1</sup> (OH), 1514 cm<sup>-1</sup> (CPA), 1370 cm<sup>-1</sup> (BO<sub>3</sub>), 1275 cm<sup>-1</sup> (AlO<sub>6</sub>), 1063 cm<sup>-1</sup> (BO<sub>4</sub>) (Fig. S5).

Crystal data for **QD-6**: C<sub>30</sub>H<sub>159</sub>N<sub>12</sub>O<sub>153</sub>B<sub>65</sub>Al<sub>12</sub>, Mr = 4163.10, trigonal, *R*-3 (No. 148). *a* =

23.7421(2) Å,  $c = 24.7699(3)$  Å,  $V = 12091.9(2)$  Å<sup>3</sup>,  $Z = 3$ ,  $\rho = 1.715$  mg·cm<sup>-3</sup>,  $\lambda = 0.71073$  Å,  $\mu(\text{MoK}\alpha) = 0.219$  mm<sup>-1</sup>,  $F(000) = 6384$ . A total of 77316 reflections were collected in the range of  $3.43^\circ \leq \theta \leq 28.28^\circ$ , of which 6616 were unique ( $R_{\text{int}} = 0.0601$ ) and 4606 with  $I \geq 2\sigma(I)$  were collected for the analysis. The structure was solved and refined by full-matrix least squares on  $F^2$  values (SHELXL-97). Non-H atoms were refined anisotropically. The final  $R_1$  values were 0.0577 ( $I \geq 2\sigma(I)$ ). The final  $wR(F^2)$  values were 0.1692 ( $I \geq 2\sigma(I)$ ). The final  $R_1$  values were 0.0869 (all data). The final  $wR(F^2)$  values were 0.1825 (all data). The goodness of fit on  $F^2$  was 1.085. CCDC 803658 for **QD-6** contains the supplementary crystallographic data for this paper. These data can be obtained free of charge from The Cambridge Crystallographic Data Centre via [www.ccdc.cam.ac.uk/data\\_request/cif](http://www.ccdc.cam.ac.uk/data_request/cif).

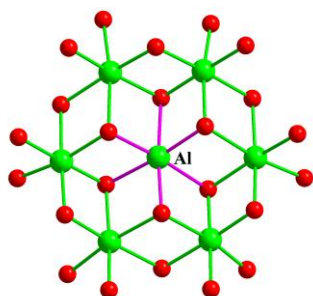

**Figure S1.** The  $[\text{Al}_7\text{O}_{24}]$  cluster in PKU-8.

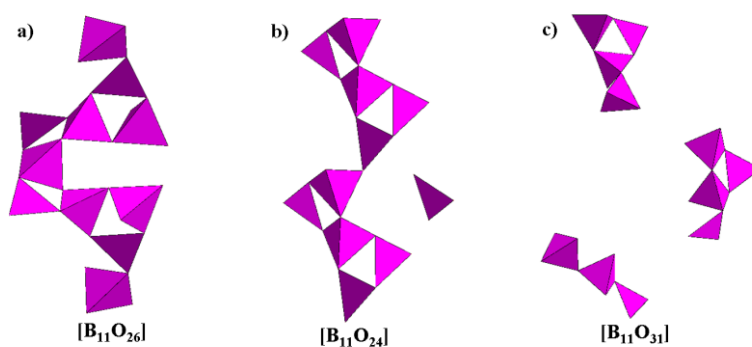

**Figure S2.** Comparison of the undecane borate *FBBs* observed in  $\text{Mg}_3[\text{B}_{11}\text{O}_{15}(\text{OH})_9]$  (a)  $\text{Sr}_2\text{B}_{11}\text{O}_{16}(\text{OH})_5 \cdot (\text{H}_2\text{O})$  (b) and  $\text{Pb}_6\text{B}_{11}\text{O}_{18}(\text{OH})_9$  (c).

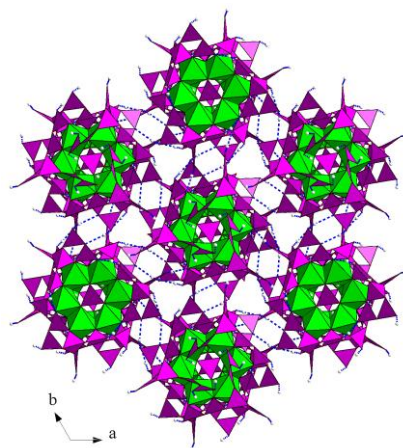

**Figure S3.** A projection of the structure of QD-6 along the *c*-axis. AlO<sub>6</sub>, green octahedra, BO<sub>4</sub> and BO<sub>3</sub>, purple.

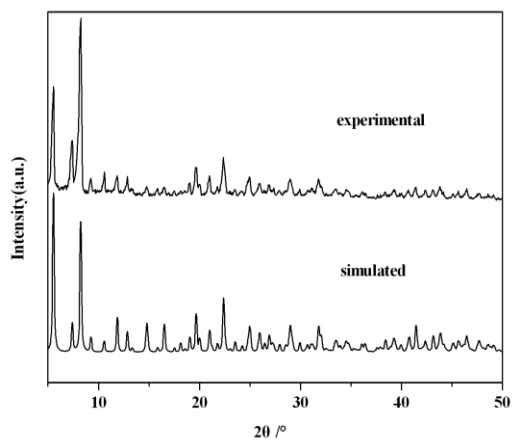

**Figure S4.** The XRD patterns of QD-6.

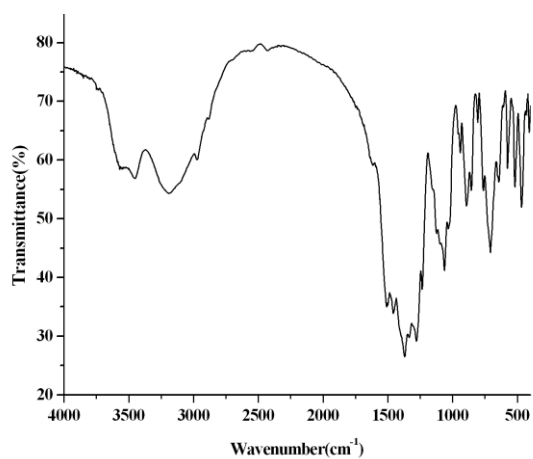

**Figure S5.** The IR spectra of QD-6.

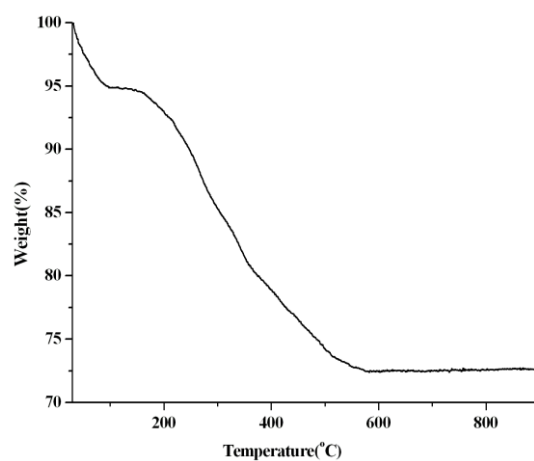

**Figure S6.** The TG curve of QD-6.

1. L. Y. Li, G. B. Li, M. Xiong, Y. X. Wang, J. H. Lin, *Acta Crystallogr., Sect. C* 2003, 59, i115.
